**Parallel radiations of *Crematosperma* and *Mosannona* (Annonaceae), tropical rainforest trees tracking Neogene upheaval of the South American continent**

Michael D. Pirie<sup>1</sup>, Paul J. M. Maas<sup>2</sup>, Rutger A. Wilschut<sup>3</sup>, Heleen Melchers-Sharrott<sup>4</sup> & Lars W. Chatrou<sup>5</sup>

<sup>1</sup>Institut für Spezielle Botanik und Botanischer Garten, Johannes Gutenberg-Universität, Anselm-Franz-von-Bentzelweg 9a, 55099 Mainz, Germany

<sup>2</sup>Naturalis Biodiversity Center, section Botany, P.O. Box 9517, 2300 RA Leiden, The Netherlands

<sup>3</sup>Department of Terrestrial Ecology, Netherlands Institute of Ecology (NIOO-KNAW), Droevendaalsesteeg 10, 6708 PB Wageningen, The Netherlands

<sup>4</sup>Omgevingsdienst Haaglanden, P.O. Box 14060, 2501 GB The Hague, The Netherlands

<sup>5</sup>Wageningen University, Biosystematics Group, Droevendaalsesteeg 1, 6708 PB Wageningen, The Netherlands

**Abstract**

Much of the immense present day biological diversity of Neotropical rainforests originated from the Miocene onwards, a period of geological and ecological upheaval in South America. We assess the impact of the Andean orogeny, drainage of lake Pebas, and closure of the Panama Isthmus on two clades of trees (*Crematosperma*, c. 31 spp.; and *Mosannona*, c. 14 spp.; both Annonaceae) found in humid forest distributed across the transition zones between the Andes and Western (lowland) Amazonia and between Central and South America. We inferred phylogenies based on c. 80% of recognised species of each clade using plastid and nuclear encoded sequence markers, revealing similar patterns of geographically restricted clades. Using molecular dating we showed that the timing of diversifications in the different areas largely overlap and are consistent with Andean vicariance and Central American geodispersal. In apparent contradiction of high dispersal abilities of rainforest trees, *Crematosperma* clades within Amazonia are also geographically restricted, with a southern/montane clade that appears to have diversified along the foothills of the Andes sister to one of more northern/lowland species that diversified in a region once inundated by lake Pebas. Ecological niche modelling approaches show phylogenetically conserved niche differentiation, particularly within *Crematosperma*. Niche similarity and recent common ancestry of Amazon and Guianan *Mosannona* species contrasts with dissimilar niches and more distant ancestry of Amazon, Venezuelan and Guianan species of *Crematosperma* suggesting that this element of the similar

patterns of disjunct distributions in the two genera had different biogeographic origins. The results provide further independent evidence for the importance of the Andean orogeny, the drainage of Lake Pebas, and the formation of links between South and Central America in the evolutionary history of Neotropical lowland rainforest trees.

Keywords: Andean orogeny; Pebas system; molecular dating; Neotropics; niche modelling; Panama isthmus; phylogeny reconstruction; tropical rainforest.

## Introduction

The immense biological diversity of the Neotropics is the net result of diversification histories of numerous individual lineages (Antonelli and Sanmartín, 2011; Hughes et al., 2013; Pennington et al., 2015). Plants and animals encompassing a wide spectrum of forms, life histories, and ecological tolerances have diversified in ecosystems ranging from high alpine-like conditions of the Andean Páramo, through to seasonally dry tropical forests and the humid forests of lowland Amazonia (Hoorn and Wesselingh, 2009; Hughes et al., 2013; Luebert and Weigend, 2014; Pennington et al., 2010). The dynamic geological and ecological contexts of Neotropical species radiations shift both in space and through time (Graham, 2011; Hughes et al., 2013). Understanding the importance of different factors in driving the origins of biological diversity therefore requires approaches that directly compare biologically equivalent radiations within the same geographical areas and evolutionary timescales with the ecological conditions that prevailed in those times and places (Fine et al., 2014; Koenen et al., 2015; Terra-Araujo et al., 2015).

Even across seemingly similar ecosystems and organisms, there are differences in levels of biodiversity within the Neotropics. For example, comparing across Neotropical rainforests, tree alpha-diversity peaks in the wetter, less seasonal part of Western Amazonia (Hoorn et al., 2010; Hoorn and Wesselingh, 2009). Correlation of this diversity with particular current conditions, such as climate and soils, may suggest a causal link in sustaining, and perhaps even driving, diversity (Kristiansen et al., 2012; Stropp et al., 2009). However, both species diversity and ecological conditions have changed dramatically in the Neotropics since the Oligocene. Hoorn et al. (2010) reviewed evidence including from the microfossil record suggesting a c. 10 to 15% increase of plant diversity between c. 7 and 5 Ma, shortly after the Late Miocene draining of the wetlands in Western Amazonia, which were replaced by forested habitats. This led them to the conclusion that the establishment of terrestrial conditions in Western Amazonia was a possible prerequisite for the (rapid) diversification of the regional biota.

The Late Miocene draining of Western Amazonia was a direct result of the uplift that caused orogeny in the Andes (Shephard et al., 2010). The latter itself has been linked to diversification, also in lowland (rather than just montane or alpine) biota (Fine et al., 2014; Gentry, 1982; Luebert and Weigend, 2014; Sarkinen et al., 2007). The timeframe of the influence of the Andean orogeny on Neotropical vegetation may extend back to the Miocene, i.e. from c. 23.3 Ma onwards (Burnham and Graham, 1999). However, much of the uplift occurred in the late Miocene and Pliocene (Gregory-Wodzicki, 2000) with intense bursts of mountain building during the late middle Miocene (c. 12 Ma) and early Pliocene (c. 4.5 Ma) (Hoorn et al., 2010). A further geological influence, the closing of the isthmus at Panama, facilitating biotic interchange between North and South America, also occurred during the Pliocene (Hoorn et al., 2010) and may also have driven diversification. The Panama isthmus has long been assumed to have fully closed by 3.5 Ma. This date has been challenged recently by fossil data and molecular phylogenetic analyses that may indicate migration across that Panama isthmus dating back to the Early Miocene, c. 6-7 Ma (Bacon et al., 2013, 2015; Thacker, 2017; Winston et al., 2017). Finally, distribution shifts along the Andean elevational range during climatic changes in the Pleistocene (c. 1.8 Ma onwards) may also have driven diversification (Hooghiemstra and van der Hammen, 1998).

These events describe an explicit temporal framework for various plausible causes of diversification in Neotropical taxa. The means to test these hypotheses is presented by clades distributed across the transition zones between the Andes and Western (lowland) Amazonia and between Central and South America.

In this paper, we focus on two clades of trees found in Neotropical humid forest. Species of *Crematosperma* (c. 31 spp.; Pirie et al., 2005) and *Mosannonna* (c. 14 spp.; Chatrou, 1998) (both Annonaceae) occur from lowland (i.e. up to 500 m) through pre-montane (500-1,500 m) and into lower elevation montane rainforest, predominantly in areas surrounding the Andes in South America but also extending north into Central America (Chatrou, 1997). No species occur on both sides of the Andean mountain chain, suggesting that the Andes represents a current barrier to dispersal. In general, few species of *Crematosperma*, and none of *Mosannonna*, co-occur, which may suggest diversification driven by allopatric speciation. Those species of *Crematosperma* with overlapping distributions are mostly limited to northern Peru and Ecuador.

Similar distribution patterns are observed in a number of other “Andean-centered” (sensu Gentry, 1982) genera of Annonaceae, including *Klarobelia* and *Malmea*. These were the subject of analyses using phylogenetic inference and molecular dating techniques by Pirie et al. (2006), who concluded that their diversifications occurred during the timeframe of the Andean orogeny. Pirie et al. (2006) also identified clades within *Mosannonna* endemic to the west and east of the Andes and

estimated the age of their divergence to be c. 15-6 Ma. Central American representatives of the predominantly Asian Annonaceae tribe Miliuseae (Chaowasku et al., 2014; Ortiz-Rodriguez et al., 2016) are not found east of the Andes, which might also suggest that the Andes formed a barrier to dispersal prior to the closure of the Panama isthmus.

However, the use and interpretation of molecular dating techniques is controversial (Graur and Martin, 2004). Empirical studies (e.g. Linder et al., 2005; Pirie et al., 2005a) indicated potential problems with methods such as Non-Parametric Rate-Smoothing (NPRS; Sanderson, 1997), Penalized Likelihood (PL; Sanderson, 2002) and multidivtime (Thorne et al., 1998), as used by Pirie et al. (2006). There has subsequently been a general shift from these to BEAST (Drummond et al., 2012), as used in various more recent analyses of Annonaceae (Couvreur et al., 2011a; Pirie and Doyle, 2012; Su and Saunders, 2009). However, the differing assumptions of each of these methods (rate autocorrelation in the case of NPRS, PL and multidivtime; as opposed to the lognormal rate distribution generally assumed using BEAST) are probably each violated to a greater or lesser extent in Annonaceae. In part as a direct consequence, molecular dating results are inconsistent, particularly with regard the ages of clades in subfamily Malmeoideae (Pirie and Doyle, 2012), which includes all the above genera.

Even if diversifications occurred within the same timeframe, they were not necessarily driven by the same underlying factors. Further phylogenetic inference approaches would allow us to test whether Andean-centered distributions that originated in *Crematosperma*, *Mosannonna*, and other Annonaceae clades were indeed influenced by common biogeographic processes (such as vicariance caused by Andean uplift), and whether allopatric speciation has been an important underlying process. For example, by combining phylogeny and species distribution modeling in an African clade of Annonaceae, Couvreur et al. (2011b) could show that niche differences among closely related (but mostly not co-occurring) species were more similar than expected by chance. This was interpreted as suggesting allopatric speciation driven by landscape changes (Couvreur et al., 2011b). Such analyses might also contribute to testing diversification scenarios in Andean-centered Neotropical Annonaceae. However, results presented in Pirie et al. (2006) were based on limited taxon sampling within the genera, and species level relationships were largely unresolved, with the geographic structure apparent within *Mosannonna* not reflected by supported clades in the other genera, limiting the power of phylogenetic approaches in general.

The aims of this paper are to reassess the timing and sequence of shifts in ancestral distributions in *Crematosperma* and *Mosannonna* to test the influence of the following factors on species diversification in the Neotropics. 1) The northern Andean orogeny, dividing western and eastern lineages; 2) the drainage of lake Pebas creating new habitat in western Amazonia; and 3) the closure of the Panama Isthmus allowing geodispersal of lineages into Central America. To this end, we use

phylogenetic inference, molecular dating and niche modelling techniques with new datasets for *Crematosperma* and *Mosannona* based on expanded sampling of taxa and DNA sequence markers.

## Materials and Methods

*Taxon sampling:* This study largely utilised previously unpublished sequence data (partly used in Pirie et al., 2005b), as well as published sequences (Mols et al., 2004; Pirie et al., 2005a, 2006, 2007; Richardson et al., 2004) (see Appendix 1). Datasets were constructed for *Crematosperma* and *Mosannona* in two separate studies employing different outgroup sampling. For the *Crematosperma* dataset, ten Malmeoideae outgroup taxa were selected: seven of tribe Malmeae, including two accessions each of the most closely related genera *Pseudoxandra* and *Malmea*; two of Miliuseae; and a single representative of Piptostigmatheae (*Annickia pilosa*) as most distant outgroup. For the *Mosannona* dataset, seven outgroup taxa were selected, exclusively from tribe Malmeae: one accession each of *Crematosperma*, *Ephedranthus*, *Klarobelia*, *Malmea*, and *Pseudomalmea*; and two of *Oxandra*.

Within *Crematosperma*, 39 accessions included 24 of the 29 described plus two informally recognised species in Pirie et al. (2005b), from across the entire geographical distribution, with some species represented by multiple accessions. For the *Mosannona* dataset, 14 accessions included 11 of the 14 species recognised by Chatrou (1998). This compares to 13 samples/species of *Crematosperma* and 7 of *Mosannona* represented in the analyses of Pirie et al. (2006).

*Character sampling:* Character sampling differed somewhat between *Crematosperma* and *Mosannona* matrices, depending on taxon-specific success with particular markers. DNA extraction, PCR and sequencing protocols for *Crematosperma* followed (Pirie et al., 2005a, 2006), with modifications for *Mosannona* (as follows). For all 49 accessions of the *Crematosperma* dataset the plastid encoded (cpDNA) markers *rbcl*, *matK*, *trnT-F* (at least partial) and *psbA-trnH* were sampled. Amplification and sequencing of a further cpDNA marker, *ndhF*, was only successful in 34 accessions and that of pseudotr*nL-F* (an ancient paralogue of the plastid *trnL-F* region; Pirie et al., 2007), was only successful in 22 including just two outgroups (both species of *Malmea*).

For all 21 accessions of the *Mosannona* dataset, cpDNA *rbcl*, *matK*, *trnL-F*, *psbA-trnH* and the nuclear marker Phytochrome C were sampled; for 8 ingroup taxa and 3 outgroups additional cpDNA markers *atpB-rbcl* and *ndhF* and the nuclear marker malate synthase were also sampled. New primers were designed for phytochrome C, based on sequences of representatives of Magnoliales from GenBank (Magnoliaceae: *Magnolia x soulangeana*, Degeneriaceae: *Degeneria vitiensis*, Eupomatiaceae: *Eupomatia laurina*, Annonaceae: *Annona sp.*). Two forward and two reverse primers

were designed: PHYC-1F: 5'-GGATTGCATTATCCGGC-3', PHYC-1R: 5'-CCAAGCAACCAGAACTGATT-3', PHYC-2F: 5'-CTCAGTACATGGCCAAYATGG-3' and PHYC-2R: 5'-GGATAGCCAGCTTCCA-3', applied in the combination 1F/2R (preferentially), 1F/1R or 2F/2R (where 1F/2R was not successful) and subsequently sequenced with 1F and 2R. Malate synthase was amplified in two overlapping pieces using the primers ms400F and ms943R (Lewis and Doyle, 2001), and mal-syn-R1 (5'-CATCTTGAGAAGATGATCGG-3') and mal-syn-F2 (5'-CCGATCATCTTCTCAAGATGATGTGG-3'), in the combinations ms400F/mal-syn-R1 and mal-syn-F2/ms943R. The thermocycler protocol for Phytochrome C followed that for *matK* (Pirie et al., 2005a); that for malate synthase was 94°C, 4 min.; 35 cycles of (94°C, 1 min.; 59°C, 1 min.; 72°C, 2 min.); 72°C, 7 min.

*Sequence alignment and model testing:* DNA sequences were edited in SeqMan 4.0 (DNASStar Inc., Madison, WI) and aligned manually. Gaps in the alignments were coded as present/absent characters where they could be coded unambiguously, following the simple gap coding principles of Simmons and Ochoterena (2000). Matrices are presented in Appendix 2 and on TreeBase (<http://purl.org/phylo/treebase/phyloids/study/TB2:S20848>). We performed preliminary phylogenetic analyses of markers separately using PAUP\* version 4.0 beta 10 (Swofford, 2003) (as below), to identify any differences between datasets, then individual markers were imported into SequenceMatrix (Vaidya et al., 2011) which was used to export concatenated matrices for further analyses. Best fitting data partitioning strategies (given models implemented in RAxML, MrBayes, and BEAST as below) were selected with PartitionFinder (Lanfear et al., 2012), given a concatenated matrix including all sequence markers and the 34 taxa for which *ndhF* was available, using a heuristic search strategy ('greedy') and comparison of fit by means of the Bayesian information criterion. Individual markers (each representing either coding or non-coding regions) were specified as potential data partitions.

*Phylogenetic analyses:* Phylogeny was inferred under parsimony, using PAUP\*; Maximum Likelihood (ML), using RAxML (Stamatakis, 2006); and Bayesian inference, using MrBayes version 3.2 (Ronquist et al., 2012). Under parsimony, heuristic searches of 1000 iterations, TBR, saving 50 trees per iteration were performed and bootstrap support was estimated for the markers individually and combined. Partitioned RAxML analyses of the nucleotide data only were performed including bootstrapping on CIPRES (Miller et al., 2010; Stamatakis et al., 2008). Bootstrapping was halted automatically following the majority-rule 'autoMRE' criterion. Two independent MrBayes runs of 10 million generations each were performed on the combined nucleotide and binary indel characters, implementing partitioned substitution models for the former, sampling every 1,000 generations. Convergence was assessed (using the PSRF) and post-burnin tree samples were summarised (using the `sumt` command) in MrBayes.

*Molecular dating:* In order to infer the timing of lineage divergences within *Crematosperma* and *Mosannona* we used BEAST 1.8.2 (Drummond et al., 2012) with a matrix of plastid markers (*rbcl*, *matK*, *trnL-trnF*, *psbA-trnH* and *ndhF*) of Malmeeae taxa combined from the individual matrices described above. Instead of using fossil evidence directly, that could only be employed across the family as a whole, we used two different secondary calibration points based on the Annonaceae-wide results of Pirie and Doyle (2012) derived using BEAST and PL. Although results based on secondary calibration should be interpreted with caution (Graur and Martin, 2004; Schenk, 2016), we could thereby analyse a matrix including only Malmeeae sequences, avoiding the uncertainty and error associated with analysing relatively sparsely sampled outgroups with contrasting evolutionary rates. Under PL, Pirie and Doyle (2012) estimated the age of the Malmeeae crown node to be 52 Ma  $\pm$  3, which we represented with a normal prior on the age of the root node with mean of 52 and SD of 3. Under BEAST, they estimated 95% PP range of the age to be 33-22 Mya, which we represented with a normal prior with mean 27, SD of 3. We employed a birth-death speciation model, assumed a lognormal rate distribution, and rooted the tree by enforcing the monophyly of the two sister clades that together represent all the species, as identified in the previous analyses. We performed two independent runs of 10 million generations, assessed their convergence using TRACER version 1.6 (Rambaut et al., 2014), and summarised the results using programs of the BEAST package.

*Species distribution modelling:* Data on occurrences of species included in the *Crematosperma* and *Mosannona* phylogenies were extracted from the herbarium specimen database (BRAHMS; Filer, 2008) of Naturalis Biodiversity Center, Leiden, the Netherlands (<http://herbarium.naturalis.nl/>). These comprised of records curated during our revisionary work on these genera based on specimens housed in multiple international herbaria. A total of 633 specimens of *Crematosperma* and 442 specimens of *Mosannona* were available that were both identified to species by the authors and adequately georeferenced. These specimens included duplicates, i.e. multiple specimens of the same species collected either at the same locality, or not distantly enough from it to be treated as separate localities in our analyses. We only modelled species distributions for species recorded at least at four unique localities. After removal of duplicates the database consisted of 222 unique occurrence data points for 10 taxa of *Mosannona* and 319 data points for 20 taxa of *Crematosperma*. The number of unique occurrence localities per species ranged from 4 (*Crematosperma macrocarpum*) to 145 (*Mosannona depressa* subsp. *depressa*). Current environmental variables were downloaded from [www.worldclim.org](http://www.worldclim.org) at 2.5 minute resolution and categorical FAO soil layers were downloaded from [www.fao.org](http://www.fao.org). In a preliminary analysis we used Pearson correlation tests to remove correlated climate and soil variables, resulting in eight independent climate layers and ten independent soil variable layers (Appendix 3). We assessed all species distribution models (SDMs) using Maxent version 3.3.3k (Phillips et al., 2006). Maxent has

been demonstrated to perform well when two conditions apply that are both relevant to the present study: (1) the availability of solely presence only occurrence data (Elith et al., 2006), and (2) the presence of a small number of point localities (Wisz et al., 2008). Given a set of point localities and environmental variables over geographical space, Maxent estimates the predicted distribution for each species. It does so by finding the distribution of maximum entropy (the distribution closest to uniform) under the constraint that the expected value of each environmental variable for the estimated distribution matches its empirical average over a sample of locations (Phillips et al., 2006). The resulting distribution model is a relative probability distribution over all grid cells in the geographical area of interest. It expresses the relative probability of the occurrence of a species in a grid cell as a function of the values of the environmental variables in that grid cell. Maxent runs were performed for each of the 29 taxa with the following options: auto features, random test percentage = 0, maximum iterations = 500.

A commonly used measure for model performance is the 'area under the curve' (AUC; Metz, 1978) that is calculated by Maxent. However, its utility has been criticized for reasons including erroneously indicating good model performance in the case of SDMs based on few records (Lobo et al., 2008; Raes and ter Steege, 2007). SDMs were tested for significance using a phylogenetically controlled null model approach (Raes and ter Steege, 2007). For each species, 100 replicate SDMs were generated using random locality points in the same numbers as the original locality points. The demarcation of the assemblage of locality points from which random samples are drawn is crucial, as a too large assemblage (e.g. the entire Neotropics) will almost certainly result in null model tests that indicate that SDMs are significantly different from random. We drew the random locality points from 1009 unique locality points where species of the tribe Malmeeae have been collected, which were extracted from the BRAHMS database of Naturalis Biodiversity Center, Leiden. *Crematosperma* and *Mosannona* belong to this tribe that comprises ca 180 species (Chatrou et al., 2012). All of these species occur in wet tropical forests, and the majority have distributions that overlap with those of species of *Crematosperma* and *Mosannona*. The replicate AUC values were sorted into ascending order and the value of the 95th element is considered as the estimate of the 95th percentile of the null model distribution. If the AUC value of the original SDM is greater than the 95th percentile it is considered significantly different from random.

Maxent output was used to calculate the pairwise Hellinger's *I* niche overlap metric between all species within *Crematosperma* and *Mosannona* using ENMtools (Warren et al., 2010). Hellinger's *I* values were then used to calculate the average niche overlap within and between the different geographically restricted *Crematosperma* and *Mosannona* clades. To test whether abiotic niches are phylogenetically conserved within both genera, we correlated pairwise Hellinger's *I* values with



pairwise patristic distances. These were calculated using PAUP\*, using one of the most parsimonious trees, adding up connecting branches between species pairs under the likelihood criterion (GTR + gamma model, all parameters estimated).

## Results

*Phylogenetic analyses:* Variable and informative characters per DNA sequence marker are reported in Table 1. Per PCR amplicon, the plastid markers provided just 6-9/1-8 informative characters within *Crematosperma/Mosannona*. Despite the short sequence length, pseud-*trnL-F* provided 13 within *Crematosperma*.

Parsimony bootstrap analysis of the individual data partitions revealed no supported incongruence (bootstrap support [BS] >70%). Data were thus combined in further analyses. Fig. 1 and Fig. 2 each show two best scoring trees as inferred under ML from the combined *Crematosperma* and *Mosannona* data respectively. Fig. 1a and Fig. 2a show results including only taxa for which *ndhF* was available; and Fig. 1b and Fig. 2b show results including all taxa (i.e. with a considerable proportion of missing data). BS under parsimony and ML, and posterior probability (PP) clade support under Bayesian inference are also indicated. In both cases, the results of parsimony analyses were consistent with those obtained under ML and Bayesian inference, but analyses of the matrices with more missing data resulted in a greater number of nodes subject to  $PP \geq 0.95$  than those subject to  $BS \geq 70$ .

The combined analyses revealed a number of clades within both *Crematosperma* and *Mosannona* corresponding to discrete geographic areas. In *Crematosperma*, the divergence of the Venezuelan and Guianan lineages, together in a well-supported clade, occurred prior to that leading to clades found in the tropical Andes or in the Chocó/Darién/western Ecuador region or Central America (i.e. either the west or the east side of the Andes mountain chain). Western species fall within a grade of three lineages (a clade including *Crematosperma panamense*, *C. novogranatense*, *C. stenophyllum* and *C. westrae*; and two isolated lineages corresponding to *C. sp. A* from Costa Rica and *C. magdalenae* from the Magdalena valley of Colombia), in which the three Central American species are not each other's closest relatives. A single clade including all Amazonian species is nested within this grade; it comprises two clades: one including more lowland and northerly distributed species; the other more southerly and higher elevation species. In *Mosannona* the species are similarly represented by a western grade and a single eastern, Amazonian, clade. The single Guianan species (none are known from Venezuela), rather than being sister to these, is nested within, part of a polytomy of western and the eastern lineages.

*Molecular dating:* Relaxed-clock molecular dating using BEAST resulted in an ultrametric tree with topology consistent with those obtained separately for *Crematosperma* and *Mosannonna* under parsimony, ML, and Bayesian inference (Fig. 3). The nodes that define the divergence of lineages to the west and east of the Andes are A) the crown nodes of the clades including exclusively Western species (such as *M. pacifica*, *M. garwoodii*, *M. costaricensis* and *M. sp.*: Fig. 3 A1; and *C. stenophyllum*, *C. panamense*, *C. novogranatense* and *C. westrae*: Fig. 3, A2); B) the stem nodes of the exclusively Amazonian clades (Fig. 3, B1 and B2), representing the age of the most recent common ancestors of western and eastern lineages; and C) the crown nodes of Amazonian clades (Fig. 3, C1 and C2). The minimum and maximum ages of dispersal into Central America are defined by the crown and stem nodes respectively of Central American lineages. In the case of *Crematosperma* these are single species/accessions and hence without crown nodes in these phylogenetic trees. In the case of *Mosannonna*, two clades of taxa are endemic to Central America (*M. depressa* spp., and *M. costaricensis/M. garwoodii*) for which both stem and crown node ages could be estimated. The age ranges for these nodes given the older and more recent secondary calibrations (root node 25-13 Ma; 12-3 Ma) are reported in Table 2. The confidence intervals for each of A1 and A2, B1 and B2 and C1 and C2 for a given calibration largely overlap. The implied time window for a putative vicariance process caused by Andean uplift ranges between 24 Ma and 7 Ma (older estimate) and 13 Ma and 3 Ma (more recent estimate). The minimum age for dispersal into Central America ranged from 15 to 1 Ma, and only for the older estimate for the *M. costaricensis/M. garwoodii* crown node did this minimum exceed 3.5 Ma (5 Ma).

Null-model tests showed that all species distribution models were significantly different from random, except for that of *Crematosperma pendulum*, which was excluded from subsequent analyses. Pairwise intra-generic Hellingers *I* niche overlap measures ranged from 0.009 (*M. depressa* subsp. *depressa* vs. *M. xanthochlora*) to 0.987 (*C. pacificum* vs *C. novogranatense*). Niche similarity was found to be negatively correlated with phylogenetic distance in *Crematosperma* (squared Pearson correlation  $R^2 = 0.1933$ ,  $p < 0.0001$ ), while it was not in *Mosannonna* (squared Pearson correlation  $R^2 = 0.0392$ ,  $p = 0.2207$ ).

Niche similarity is considerably greater for Amazonian species than for species in any of the remaining areas (Table 3). In contrast, the smallest niche overlap for species within a given area was observed for the areas west of the Andes, viz. Pacific South America and Central America. Niche similarity within each of the four areas exceeds niche similarity between them in all cases. Only the mean value for Hellinger's *I* within Pacific / Central America approaches those for between-area niche similarity. For *Crematosperma*, the two areas with the largest niche differences are the Amazonian lowland and the Guianas / Venezuela. For *Mosannonna* niche overlap cannot be calculated

for the Guianas and Venezuela due to the occurrence of only single species, yet the within-area niche differences are larger in the Amazonian lowland than Pacific South America and Central America, as in *Crematosperma*.

## Discussion

*Consistent biogeographic signals revealed in densely sampled phylogenies of two rainforest tree genera:* Our sampling of both *Crematosperma* and *Mosannona* included representatives of approaching 80% of the recognised species. Given the rarity and inaccessibility of many species in the field, this representation was achieved largely with DNA extracted from herbarium specimens at the expense of a greater practical challenge in the lab, due to suboptimal DNA quality, and consequent failure to sequence particular markers for particular taxa. Including such taxa in phylogenetic analyses despite missing data resulted in consistent topologies but markedly fewer significantly supported nodes under bootstrapping than under Bayesian inference, as is typical of supermatrix analyses (Wiens et al., 2005). By comparing the results to those of analyses including fewer taxa but a lesser proportion of missing data, we could test the membership of the major clades whilst successfully resolving the relationships between them (Figs. 1 and 2).

The phylogenetic hypotheses for *Crematosperma* and *Mosannona* show strong geographic signal, with clades endemic both to regions divided by obvious present day dispersal barriers (east and west of the Andes), and to regions that are currently largely contiguous (i.e. within Amazonia). These results appear to contrast with the assumptions of rapid dispersal abilities of Amazon biota (Dick et al., 2003; Pennington and Dick, 2011), such as species-rich Neotropical lowland clades (Dexter et al., 2017) including the more typically Amazon-centred, more widely distributed, Annonaceae genus *Guatteria* (Erkens et al., 2007). The strong correlation between phylogenetic patterns and geographic areas found here resembles more closely the patterns found in Neotropical birds (Smith et al., 2014).

Andean-centred distribution patterns are the exception in Neotropical Annonaceae clades, but have originated multiple times independently (Pirie et al., 2006). This may reflect an ecological distinction between more montane genera such as *Crematosperma* and *Mosannona* and their widespread lowland sister-groups. It may also be associated with more limited dispersal abilities of the smaller understorey trees typical of *Crematosperma* and *Mosannona*, as opposed to canopy trees (Kristiansen et al., 2012) as represented e.g. by species of *Guatteria*. Similarities between different Andean-centred clades suggests the potential for identifying common and more general underlying causes.

*The impact of the Andean orogeny on lowland rainforest taxa in the Neotropics:* The diversifications of extant species of *Crematosperma* and *Mosannona* date to the Middle-Late Miocene. During this era, the uplift of the westernmost Cordillera Occidental, the oldest of three cordilleras in Colombia, and of the Cordillera Central had been completed (Fig. 5). The easternmost Cordillera Oriental was the last Colombian cordillera to rise, with uplift starting around 13-12 Ma. The Cordillera Oriental is decisive for the establishment of a dispersal barrier for lowland organisms on either side of the Andes. During the Miocene it consisted of low hills, only attaining its current height during the Pliocene and early Pleistocene (Gregory-Wodzicki, 2000), and as a result the northwestern part of the current Amazon basin was contiguous with areas now in the Colombian states of Chocó and Antioquia, west of the Andes.

Rough bounds for the timing of establishment of an east-west dispersal barrier can be inferred from stem and crown node ages of exclusively eastern and western clades. In both *Crematosperma* and *Mosannona* the stem node ages, representing common ancestors that were either widespread or which were able to disperse between areas, date to 24-10 Ma (older estimates) or 13-5 Ma (more recent estimates). Crown node ages, representing common ancestors after which there is no further evidence for such dispersal, date to 22-7 Ma (older estimates) or 11-3 Ma (more recent estimates). The error margins are wide, but consistent with a vicariance scenario. Similar signatures, regarding topology and node ages, of the Andes as a strong barrier to dispersal have been found in phylogeographic patterns of individual species (Dick et al., 2003; Scotti-Saintagne et al., 2013), and phylogenies of clades of lowland tree species (Antonelli et al., 2009; Roncal et al., 2013).

*The drainage of lake Pebas, dispersal and diversification in western Amazonia:* In the period prior to the Andes developing as a dispersal barrier for lowland rainforest biota, it has been proposed that dispersal from northwestern South America further into the Amazon was blocked by a wetland system that flooded the entire western Amazon (Hoorn et al., 2010; Wesselingh et al., 2002). This wetland system, known as the Pebas system, or lake Pebas, existed from c. 17 to c. 11 Ma (Hoorn et al., 2010). Continuous discharge of weathered material from the rising Andes led to the gradual eastwards expansion of terra firme forests, and as a result by the end of the Miocene the Pebas system ceased to exist. One of the first areas to emerge in the upper Amazon basin was the Vaupes Swell or Vaupes Arch, a promontory that separated the Orinoco and Amazon rivers into their current drainage systems. The Vaupes Arch was already covered with terra firme forest during the Upper Miocene, when the Acre system to the south and the residual Pebas system still inundated parts of northwestern Amazonia. The Vaupes Arch may have acted as a dispersal route from western Amazonia to the Guianas for frogs during the Late Miocene (Lötters et al., 2010).

This route is also plausible in the case of *Crematosperma*. The divergence of the Venezuelan/Guianan clade was prior to that of western and eastern clades, which suggests either an earlier widespread distribution, or stepping stone dispersal, across northern South America. The absence of *Mosannona* in rainforest of coastal Venezuela could be explained by extinction or failure to sample species (the taxa known to this region are rare; Chatrou and Pirie, 2005). However, the differences between the two genera both in relationships and in the niches of the Guianan species compared to other clades may instead point to different origins. Whilst *Crematosperma* Venezuelan/Guianan clades are both distantly related and occupy more dissimilar niches compared to Amazonian clades, the Guianan *M. discolor* is closely related to the *Mosannona* Amazonian clade and similar in niche. This may imply a more southerly dispersal route that could have occurred much more recently.

Despite the broad similarities between *Crematosperma* and *Mosannona*, the clades also differ in species numbers, particularly reflected in fewer Amazonian taxa in *Mosannona*. In *Crematosperma*, we identified a single Amazonian clade comprising two subclades of contrasting distributions: one of more lowland, northerly species, the other of more montane or southerly distributed species (Fig. 1; Fig. 3). These patterns reflect clade-specific niche differences, whereby species of the lowland/northern clade occupy a particularly narrow niche compared to the montane/southerly clade.

Given its distribution and age (crown node between 14 and 2 Ma old), the lowland/northern clade may provide further evidence of diversification within the forested habitat that formed following drainage of Lake Pebas. A similar result was obtained within the palm genus *Astrocaryum* (Roncal et al., 2013), whilst in Quiinoideae diversification was earlier, with subsequent independent colonisations of the region (Schneider and Zizka, 2017). The distributions of the individual species of lowland/northern *Crematosperma* broadly overlap, but they are morphologically distinct and particularly diverse in floral characteristics, with large differences in flower colour, indumenta, and inflorescence structure. This might point to sympatric speciation in the group, perhaps driven by pollinators or herbivores, as demonstrated for some Neotropical clades of woody plants (Alcantara et al., 2014; Kursar et al., 2009).

The montane/southern *Crematosperma* clade by contrast is morphologically more homogenous, spread over a wider latitudinal range and with lesser overlap in the distributions of individual species (with the exception of the widespread *C. monospermum*, which alone represents much of the northern and eastern extremities of the clade; Fig. 3). Given the age of this clade and its proximity to the Andes, diversification may have been influenced by habitat shifts caused by uplift and/or Pleistocene climatic fluctuations. The large proportion of such pre-montane species across the

*Crematosperma* clade as a whole may explain the lack of niche-based evidence for allopatric speciation, with the significant negative correlation between phylogenetic distance and niche overlap (Fig. 4A) reflecting (phylogenetically conserved) niche differentiation. Both this scenario and that for the lowland/northern clade differ markedly from that of allopatric speciation with lack of niche shifts inferred in the diversification of lowland *Monodora* and *Isolona* (Annonaceae) in Africa (Couvreur et al., 2011b).

In *Mosannonna*, the single Amazonian clade represents far fewer species and ecological distinctions between clades are not so obvious. The overall niche overlap is lower than that of the *Crematosperma* lowland Amazon clade, suggesting that *Mosannonna* may have failed to adapt to the same habitat and, perhaps as a result, failed to diversify to the same extent. Neither niche conservatism, nor a negative correlation between phylogenetic distance and niche overlap as seen in *Crematosperma*, are significant across the genus as a whole. This may in part reflect the lower numbers of species and/or records available for analysis. However, despite lack of evidence from ecological niches, given the entirely non-overlapping species distributions, allopatric speciation in this and the wider clade is still plausible.

*Closure of the Panama Isthmus and geodispersal into Central America:* Numerous studies have assumed an age of 3.5 Ma from which dispersal between North-Central and South America would have been possible. Recently evidence has been presented suggesting that dispersal across the Panama Isthmus had been possible prior to its complete closure (Bacon et al., 2015), and Winston et al. (2017) demonstrated that strictly terrestrial South American army ants colonized Central America in two waves of dispersal, the earliest of which occurred 7 Ma. However, pre-Pliocene dates for the formation of an isthmus are still disputed (O’Dea et al., 2016), and further data is warranted to test the hypotheses further.

Of the species of *Crematosperma* and *Mosannonna* that are found in Central America, only a few extend beyond Panama or Costa Rica and some, such as *C. panamense* and *M. hypoglauca*, straddle the Panama/Colombian border with populations in both Central and South America. Central American lineages of *Crematosperma* are single species nested within western clades, implying multiple independent northerly dispersals. The stem lineages date to 20-1 MY, and these dispersal events must have taken place subsequently, but given the data available it is not possible to further narrow down the timeframe. *Mosannonna* include two clades of exclusively Central American species (*M. garwoodii* and *M. costaricensis*) or subspecies (*M. depressa*), also nested within a western grade, and the ages of these crown groups can be interpreted as minima for the preceding northerly dispersals. Although independent arrivals over earlier land connections (Bacon et al., 2015) or even (long-distance) dispersal (Hughes et al., 2013; Pennington and Dick, 2011) cannot be ruled out, the

ages of these nodes, ranging from 12-1 and 15-2 Ma would not exclude a scenario of concerted range expansions (i.e. geodispersal) following Pliocene closure of the isthmus.

The biogeographic scenario that emerges from our study reinforces the importance of the geological history of north-western South America during the Late Miocene – Early Pliocene for the evolution of plant diversity in the Neotropics. Three major geological processes (the uplift of the Andes, lake Pebas, and the Panama isthmus) interacted within a timeframe sufficiently narrow to challenge the discerning power of current molecular dating techniques. Ancestral lineages that were present in north-western South America were subject to vicariance and to opportunities for dispersal within a period of little more than about 4 million years. These events nevertheless left common signatures in the phylogenies of clades such as *Crematosperma* and *Mosannonna* (Fig. 5) that in part – though not entirely – are reflected in the similarities in their modern distributions.

*The future for species-level phylogenetic inference in Annonaceae clades:* Within well-supported geographically defined clades, resolution of the phylogenies presented here is limited, with polytomies and low clade support reflecting zero-length or short internal branches. Plastid markers provided few informative characters at this low taxonomic level (Table 1), and Sanger sequencing approaches are probably not a realistic strategy for deriving fully resolved phylogenies of clades of closely related species in Malmeoideae, which is characterised by low rates of molecular evolution (Mols et al., 2004; Richardson et al., 2004). This also applies to larger genera in the faster evolving Annonoideae, the challenge of *Guatteria* (Erkens et al., 2007) being a case in point. One alternative currently being explored is to expand plastid datasets using high throughput sequencing (Hoekstra et al., unpubl.). Whole plastid sequences might be expected to deliver a well-resolved plastid gene tree, but particularly at low taxonomic levels this might differ markedly from the underlying species tree (Doyle, 1992; Maddison, 1997). The lack of clear monophyly of species represented by multiple accessions in our analyses may indicate the influence of such population-level processes at recent timescales, which might be frequent in rainforest species due to large effective population sizes maintained over large areas (Pennington and Lavin, 2016). The development of protocols for more variable markers (such as independent single copy nuclear genes) is of importance to test such assumptions and further address problems in species-level analyses in Annonaceae.

#### Acknowledgments

The authors acknowledge The Netherlands Organisation for Scientific Research (NWO; R 85-351 to MDP) and the Hugo de Vries Foundation (to LWC) for support of fieldwork, and Jan Wieringa for assistance with the BRAHMS database.

## References

- Alcantara, S., Ree, R. H., Martins, F. R., and Lohmann, L. G. (2014). The effect of phylogeny, environment and morphology on communities of a lianescent clade (Bignoniaceae-Bignoniaceae) in Neotropical biomes. *PLoS One* 9, 1–10. doi:10.1371/journal.pone.0090177.
- Antonelli, A., Nylander, J. a a, Persson, C., and Sanmartín, I. (2009). Tracing the impact of the Andean uplift on Neotropical plant evolution. *Proc. Natl. Acad. Sci. U. S. A.* 106, 9749–9754. doi:10.1073/pnas.0811421106.
- Antonelli, A., and Sanmartín, I. (2011). Why are there so many plant species in the Neotropics? *Taxon* 60, 403–414. Available at: <http://www.ingentaconnect.com/content/iapt/tax/2011/00000060/00000002/art00010>.
- Bacon, C. D., Mora, A., Wagner, W. L., and Jaramillo, C. A. (2013). Testing geological models of evolution of the Isthmus of Panama in a phylogenetic framework. *Bot. J. Linn. Soc.* 171, 287–300. doi:10.1111/j.1095-8339.2012.01281.x.
- Bacon, C. D., Silvestro, D., Jaramillo, C., Smith, B. T., Chakrabarty, P., and Antonelli, A. (2015). Biological evidence supports an early and complex emergence of the Isthmus of Panama. *Proc. Natl. Acad. Sci. U. S. A.* 112, 6110–5. doi:10.1073/pnas.1423853112.
- Chaowasku, T., Thomas, D. C., van der Ham, R. W. J. M., Smets, E. F., Mols, J. B., and Chatrou, L. W. (2014). A plastid DNA phylogeny of tribe miliuseae: Insights into relationships and character evolution in one of the most recalcitrant major clades of annonaceae. *Am. J. Bot.* 101, 691–709. doi:10.3732/ajb.1300403.
- Chatrou, L. W. (1997). Studies in Annonaceae XXVIII. Macromorphological variation of recent invaders in northern Central America: the case of *Malmea* (Annonaceae). *Am. J. Bot.* 84, 861–869.
- Chatrou, L. W. (1998). *Changing Genera: Systematic studies in Neotropical and West African Annonaceae. PhD Thesis.* Utrecht University.
- Chatrou, L. W., and Pirie, M. D. (2005). Three new rarely collected or endangered species of Annonaceae from Venezuela. *Blumea* 50, 33–40. doi:10.3767/000651905X623265.
- Chatrou, L. W., Pirie, M. D., Erkens, R. H. J., Couvreur, T. L. P., Neubig, K. M., Abbott, J. R., et al. (2012). A new subfamilial and tribal classification of the pantropical flowering plant family Annonaceae informed by molecular phylogenetics. *Bot. J. Linn. Soc.* 169, 5–40. doi:10.1111/j.1095-8339.2012.01235.x.
- Couvreur, T. L. P., Pirie, M. D., Chatrou, L. W., Saunders, R. M. K., Su, Y. C. F., Richardson, J. E., et al. (2011a). Early evolutionary history of the flowering plant family Annonaceae: Steady diversification and boreotropical geodispersal. *J. Biogeogr.* 38, 664–680. doi:10.1111/j.1365-2699.2010.02434.x.
- Couvreur, T. L. P., Porter-Morgan, H., Wieringa, J. J., and Chatrou, L. W. (2011b). Little ecological divergence associated with speciation in two African rain forest tree genera. *BMC Evol. Biol.* 11, 296. doi:10.1186/1471-2148-11-296.
- Dexter, K. G., Lavin, M., Torke, B. M., Twyford, A. D., Kursar, T. A., Coley, P. D., et al. (2017). Dispersal assembly of rain forest tree communities across the Amazon basin. *Proc. Natl. Acad. Sci.* 114, 2645–2650. doi:10.1073/pnas.1613655114.
- Dick, C. W., Abdul-Salim, K., and Bermingham, E. (2003). Molecular Systematic Analysis



- Reveals Cryptic Tertiary Diversification of a Widespread Tropical Rain Forest Tree. *Am. Nat.* 162, 691–703. doi:10.1086/379795.
- Doyle, J. J. (1992). Gene Trees and Species Trees: Molecular Systematics as One-Character Taxonomy. *Syst. Bot.* 17, 144–163. doi:10.2307/2419070.
- Drummond, A. J., Suchard, M. A., Xie, D., and Rambaut, A. (2012). Bayesian phylogenetics with BEAUti and the BEAST 1.7. *Mol. Biol. Evol.* 29, 1969–1973. doi:10.1093/molbev/mss075.
- Elith, J., H. Graham, C., P. Anderson, R., Dudík, M., Ferrier, S., Guisan, A., et al. (2006). Novel methods improve prediction of species' distributions from occurrence data. *Ecography (Cop.)*. 29, 129–151. doi:10.1111/j.2006.0906-7590.04596.x.
- Erkens, R. H. J., Chatrou, L. W., Maas, J. W., van der Niet, T. T., and Savolainen, V. (2007). A rapid diversification of rainforest trees (Gutteria; Annonaceae) following dispersal from Central into South America. *Mol. Phylogenet. Evol.* 44, 399–411. doi:10.1016/j.ympev.2007.02.017.
- Fine, P. V. A., Zapata, F., and Daly, D. C. (2014). Investigating processes of neotropical rain forest tree diversification by examining the evolution and historical biogeography of the proteiae (Burseraceae). *Evolution (N. Y.)*. 68, 1988–2004. doi:10.1111/evo.12414.
- Gentry, A. H. (1982). Neotropical floristic diversity: phytogeographical connections between Central and South America, Pleistocene climatic fluctuations, or an accident of the Andean orogeny? *Ann. Missouri Bot. Gard.* 69, 557–593. doi:10.2307/2399084.
- Graham, A. (2011). The age and diversification of terrestrial New World ecosystems through Cretaceous and Cenozoic time. *Am. J. Bot.* 98, 336–351. doi:10.3732/ajb.1000353.
- Graur, D., and Martin, W. (2004). Reading the entrails of chickens: molecular timescales of evolution and the illusion of precision. *Trends Genet.* 20, 80–86. doi:10.1016/j.tig.2003.12.003.
- Hooghiemstra, H., and van der Hammen, T. (1998). Neogene and Quaternary development of the neotropical rain forest: the forest refugia hypothesis, and a literature overview. *Earth-Science Rev.* 44, 147–183. doi:10.1016/S0012-8252(98)00027-0.
- Hoorn, C., and Wesselingh, F. P. (2009). *Amazonia: Landscape and Species Evolution.*, eds. C. Hoorn and F. P. Wesselingh Oxford, UK: Wiley-Blackwell Publishing Ltd. doi:10.1002/9781444306408.
- Hoorn, C., Wesselingh, F. P., ter Steege, H., Bermudez, M. A., Mora, A., Sevink, J., et al. (2010). Amazonia Through Time: Andean Uplift, Climate Change, Landscape Evolution, and Biodiversity. *Science (80- )*. 330, 927–931. doi:10.1126/science.1194585.
- Hughes, C. E., Pennington, R. T., and Antonelli, A. (2013). Neotropical Plant Evolution: Assembling the Big Picture. *Bot. J. Linn. Soc.* 171, 1–18. doi:10.1111/boj.12006.
- Koenen, E. J., Clarkson, J. J., Pennington, T. D., and Chatrou, L. W. (2015). Recently evolved diversity and convergent radiations of rainforest mahoganies (Meliaceae) shed new light on the origins of rainforest hyperdiversity. *New Phytol* 207, 327–339. doi:10.1111/nph.13490.
- Kristiansen, T., Svenning, J. C., Eiserhardt, W. L., Pedersen, D., Brix, H., Munch Kristiansen, S., et al. (2012). Environment versus dispersal in the assembly of western Amazonian palm communities. *J. Biogeogr.* 39, 1318–1332. doi:10.1111/j.1365-2699.2012.02689.x.
- Kursar, T. a, Dexter, K. G., Lokvam, J., Pennington, R. T., Richardson, J. E., Weber, M. G., et al. (2009). The evolution of antiherbivore defenses and their contribution to species coexistence in the tropical tree genus *Inga*. *Proc. Natl. Acad. Sci. U. S. A.* 106, 18073–18078. doi:10.1073/pnas.0904786106.
- Lanfear, R., Calcott, B., Ho, S. Y. W., and Guindon, S. (2012). PartitionFinder: Combined

- Selection of Partitioning Schemes and Substitution Models for Phylogenetic Analyses. *Mol. Biol. Evol.* 29, 1695–1701. doi:10.1093/molbev/mss020.
- Lewis, C. E., and Doyle, J. J. (2001). Phylogenetic Utility of the Nuclear Gene Malate Synthase in the Palm Family (Arecaceae). *Mol. Phylogenet. Evol.* 19, 409–420. doi:10.1006/mpev.2001.0932.
- Linder, H. P., Hardy, C. R., and Rutschmann, F. (2005). Taxon sampling effects in molecular clock dating: An example from the African Restionaceae. *Mol. Phylogenet. Evol.* 35, 569. doi:10.1016/j.ympev.2004.12.006.
- Lobo, J. M., Jiménez-valverde, A., and Real, R. (2008). AUC: A misleading measure of the performance of predictive distribution models. *Glob. Ecol. Biogeogr.* 17, 145–151. doi:10.1111/j.1466-8238.2007.00358.x.
- Lötters, S., van der Meijden, A., Rödder, D., Köster, T. E., Kraus, T., La Marca, E., et al. (2010). Reinforcing and expanding the predictions of the disturbance vicariance hypothesis in Amazonian harlequin frogs: A molecular phylogenetic and climate envelope modelling approach. *Biodivers. Conserv.* 19, 2125–2146. doi:10.1007/s10531-010-9869-y.
- Luebert, F., and Weigend, M. (2014). Phylogenetic insights into Andean plant diversification. *Front. Ecol. Evol.* 2, 1–17. doi:10.3389/fevo.2014.00027.
- Maddison, W. P. (1997). Gene Trees in Species Trees. *Syst. Biol.* 46, 523–536. doi:10.1093/sysbio/46.3.523.
- Metz, C. E. (1978). Basic principles of ROC analysis. *Semin. Nucl. Med.* 8, 283–298. doi:10.1016/S0001-2998(78)80014-2.
- Miller, M. A., Pfeiffer, W., and Schwartz, T. (2010). Creating the CIPRES Science Gateway for inference of large phylogenetic trees. in *Proceedings of the Gateway Computing Environments Workshop (GCE) (New Orleans, LA)*, 1–8. doi:10.1109/GCE.2010.5676129.
- Mols, J. B., Gravendeel, B., Chatrou, L. W., Pirie, M. D., Bygrave, P. C., Chase, M. W., et al. (2004). Identifying clades in Asian Annonaceae: monophyletic genera in the polyphyletic Miliuseae. *Am. J. Bot.* 91, 590–600. doi:10.3732/ajb.91.4.590.
- O’Dea, A., Lessios, H. A., Coates, A. G., Eytan, R. I., Restrepo-Moreno, S. A., Cione, A. L., et al. (2016). Formation of the Isthmus of Panama. *Sci. Adv.* 2, e1600883. doi:10.1126/sciadv.1600883.
- Ortiz-Rodriguez, A. E., Ruiz-Sanchez, E., and Ornelas, J. F. (2016). Phylogenetic Relationships among Members of the Neotropical Clade of Miliuseae (Annonaceae): Generic Non-monophyly of *Desmopsis* and *Stenanona*. *Syst. Bot.* 41, 815–822. doi:10.1600/036364416X693928.
- Pennington, R. T., and Dick, C. W. (2011). “Diversification of the Amazonian Flora and its Relation to key Geological and Environmental Events: A Molecular Perspective,” in *Amazonia: Landscape and Species Evolution*, eds. C. Hoorn and F. P. Wesselingh (Oxford, UK: Wiley-Blackwell Publishing Ltd.), 373–385. doi:10.1002/9781444306408.ch23.
- Pennington, R. T., Hughes, M., and Moonlight, P. W. (2015). The Origins of Tropical Rainforest Hyperdiversity. *Trends Plant Sci.* 20, 693–695. doi:10.1016/j.tplants.2015.10.005.
- Pennington, R. T., and Lavin, M. (2016). The contrasting nature of woody plant species in different neotropical forest biomes reflects differences in ecological stability. *New Phytol.* 210, 25–37. doi:10.1111/nph.13724.
- Pennington, R. T., Lavin, M., Särkinen, T., Lewis, G. P., Klitgaard, B. B., and Hughes, C. E. (2010). Contrasting plant diversification histories within the Andean biodiversity hotspot. *Proc. Natl. Acad. Sci. U. S. A.* 107, 13783–13787.

- doi:10.1073/pnas.1001317107.
- Phillips, S. J., Anderson, R. P., and Schapire, R. E. (2006). Maximum entropy modeling of species geographic distributions. *Ecol. Modell.* 190, 231–259. doi:10.1016/j.ecolmodel.2005.03.026.
- Pirie, M. D., Chatrou, L. W., Erkens, R. H. J., Maas, J. W., Van der Niet, T., Mols, J. B., et al. (2005a). “Phylogeny reconstruction and molecular dating in four Neotropical genera of Annonaceae: the effect of taxon sampling in age estimations,” in *Plant Species-level Systematics: New Perspectives on Pattern and Process*, eds. F. T. Bakker, L. W. Chatrou, B. Gravendeel, and P. B. Pelsner (Regnum Vegetabile 143, A. R. G. Gantner Verlag, Liechtenstein), 149–174. Available at: <http://dspace.library.uu.nl/handle/1874/3279>.
- Pirie, M. D., Chatrou, L. W., Mols, J. B., Erkens, R. H. J., and Oosterhof, J. (2006). “Andean-centred” genera in the short-branch clade of Annonaceae: Testing biogeographical hypotheses using phylogeny reconstruction and molecular dating. *J. Biogeogr.* 33, 31–46. doi:10.1111/j.1365-2699.2005.01388.x.
- Pirie, M. D., and Doyle, J. A. (2012). Dating clades with fossils and molecules: The case of Annonaceae. *Bot. J. Linn. Soc.* 169, 84–116. doi:10.1111/j.1095-8339.2012.01234.x.
- Pirie, M. D., Kankainen, S., and Maas, P. J. M. (2005b). “Revision and phylogeny of *Crematosperma* (Annonaceae),” in *PhD thesis. Crematosperma (and other evolutionary digressions). Molecular phylogenetic, biogeographic, and taxonomic studies in Neotropical Annonaceae*, ed. M. D. Pirie (Utrecht: Universiteit Utrecht), 87–191.
- Pirie, M. D., Vargas, M. P. B. B., Botermans, M., Bakker, F. T., and Chatrou, L. W. (2007). Ancient paralogy in the cpDNA trnL-F region in Annonaceae: implications for plant molecular systematics. *Am. J. Bot.* 94, 1003–1016. doi:10.3732/ajb.94.6.1003.
- Raes, N., and ter Steege, H. (2007). A null-model for significance testing of presence-only species distribution models. *Ecography (Cop.)*. 30, 727–736. doi:10.1111/j.2007.0906-7590.05041.x.
- Rambaut, A., Suchard, M. A., Xie, D., and Drummond, A. J. (2014). Tracer v1.6. Available at: <http://beast.bio.ed.ac.uk/Tracer>.
- Richardson, J. E., Chatrou, L. W., Mols, J. B., Erkens, R. H. J., and Pirie, M. D. (2004). Historical biogeography of two cosmopolitan families of flowering plants: Annonaceae and Rhamnaceae. *Philos. Trans. R. Soc. B Biol. Sci.* 359, 1495–1508. doi:10.1098/rstb.2004.1537.
- Roncal, J., Kahn, F., Millan, B., Couvreur, T. L. P., and Pintaud, J. C. (2013). Cenozoic colonization and diversification patterns of tropical American palms: Evidence from *Astrocaryum* (Arecaceae). *Bot. J. Linn. Soc.* 171, 120–139. doi:10.1111/j.1095-8339.2012.01297.x.
- Ronquist, F., Teslenko, M., Van Der Mark, P., Ayres, D. L., Darling, A., Höhna, S., et al. (2012). MrBayes 3.2: efficient Bayesian phylogenetic inference and model choice across a large model space. *Syst. Biol.* 61, 539–542. doi:10.1093/sysbio/sys029.
- Sanderson, M. J. (1997). A nonparametric approach to estimating divergence times in the absence of rate constancy. *Mol. Biol. Evol.* 14, 1218–1231.
- Sanderson, M. J. (2002). Estimating absolute rates of molecular evolution and divergence times: a penalized likelihood approach. *Mol. Biol. Evol.* 19, 101–109.
- Sarkinen, T. E., Newman, M. F., Maas, P. J. M., Maas, H., Poulsen, A. D., Harris, D. J., et al. (2007). Recent oceanic long-distance dispersal and divergence in the amphi-Atlantic rain forest genus *Renealmia* L.f. (Zingiberaceae). *Mol. Phylogenet. Evol.* 44, 968. doi:10.1016/j.ympev.2007.06.007.

- Schenk, J. J. (2016). Consequences of Secondary Calibrations on Divergence Time Estimates. *PLoS One* 11, e0148228. doi:10.1371/journal.pone.0148228.
- Schneider, J. V., and Zizka, G. (2017). Phylogeny, taxonomy and biogeography of Neotropical Quiinoideae (Ochnaceae s.l.). *Taxon* in press.
- Scotti-Saintagne, C., Dick, C. W., Caron, H., Vendramin, G. G., Troispoux, V., Sire, P., et al. (2013). Amazon diversification and cross-Andean dispersal of the widespread Neotropical tree species *Jacaranda copaia* (Bignoniaceae). *J. Biogeogr.* 40, 707–719. doi:10.1111/j.1365-2699.2012.02797.x.
- Shephard, G. E., Müller, R. D., Liu, L., and Gurnis, M. (2010). Miocene drainage reversal of the Amazon River driven by plate–mantle interaction. *Nat. Geosci.* 3, 870–875. doi:10.1038/ngeo1017.
- Simmons, M. P., and Ochoterena, H. (2000). Gaps as Characters in Sequence-Based Phylogenetic Analyses. *Syst. Biol.* 49, 369–381. doi:10.1080/10635159950173889.
- Smith, B. T., Harvey, M. G., Faircloth, B. C., Glenn, T. C., and Brumfield, R. T. (2014). Target capture and massively parallel sequencing of ultraconserved elements for comparative studies at shallow evolutionary time scales. *Syst. Biol.* 63, 83–95. doi:10.1093/sysbio/syt061.
- Stamatakis, A. (2006). RAxML-VI-HPC: maximum likelihood-based phylogenetic analyses with thousands of taxa and mixed models. *Bioinformatics* 22, 2688–2690. doi:10.1093/bioinformatics/btl446.
- Stamatakis, A., Hoover, P., and Rougemont, J. (2008). A Rapid Bootstrap Algorithm for the RAxML Web Servers. *Syst. Biol.* 57, 758–771. doi:10.1080/10635150802429642.
- Stropp, J., ter Steege, H., and Malhi, Y. (2009). Disentangling regional and local tree diversity in the Amazon. *Ecography (Cop.)*. 32, 46–54. doi:10.1111/j.1600-0587.2009.05811.x.
- Su, Y. C. F., and Saunders, R. M. K. (2009). Evolutionary divergence times in the Annonaceae: evidence of a late Miocene origin of *Pseuduvaria* in Sundaland with subsequent diversification in New Guinea. *BMC Evol. Biol.* 9, 153. doi:10.1186/1471-2148-9-153.
- Swofford, D. L. (2003). PAUP\*. Phylogenetic analysis using parsimony (\* and other methods). Version 4.
- Terra-Araujo, M. H., de Faria, A. D., Vicentini, A., Nylinder, S., and Swenson, U. (2015). Species tree phylogeny and biogeography of the Neotropical genus *Pradosia* (Sapotaceae, Chrysophylloideae). *Mol. Phylogenet. Evol.* 87, 1–13. doi:10.1016/j.ympev.2015.03.007.
- Thacker, C. E. (2017). Patterns of divergence in fish species separated by the Isthmus of Panama. *BMC Evol. Biol.* 17, 111. doi:10.1186/s12862-017-0957-4.
- Thorne, J. L., Kishino, H., and Painter, I. S. (1998). Estimating the rate of evolution of the rate of molecular evolution. *Mol. Biol. Evol.* 15, 1647–1657. doi:10.1093/oxfordjournals.molbev.a025892.
- Vaidya, G., Lohman, D. J., and Meier, R. (2011). SequenceMatrix: concatenation software for the fast assembly of multi-gene datasets with character set and codon information. *Cladistics* 27, 171–180. doi:10.1111/j.1096-0031.2010.00329.x.
- Warren, D. L., Glor, R. E., and Turelli, M. (2010). ENMTools: A toolbox for comparative studies of environmental niche models. *Ecography (Cop.)*. 33, 607–611. doi:10.1111/j.1600-0587.2009.06142.x.
- Wesselingh, F. P., Rasanen, M. E., Irion, G., Vonhof, H. B., Kaandorp, R., Renema, W., et al. (2002). Lake Pebas: a palaeoecological reconstruction long-lived lake complex in western Amazonia. *Cainozoic Res.* 1, 35–81. Available at: <http://www.falw.vu/~palmorph/publ/wess02.pdf>.

- Wiens, J. J., Fetzner, J. W., Parkinson, C. L., and Reeder, T. W. (2005). Hylid frog phylogeny and sampling strategies for speciose clades. *Syst. Biol.* 54, 778–807. doi:10.1080/10635150500234625.
- Winston, M. E., Kronauer, D. J. C., and Moreau, C. S. (2017). Early and dynamic colonization of Central America drives speciation in Neotropical army ants. *Mol. Ecol.* 26, 859–870. doi:10.1111/mec.13846.
- Wisz, M. S., Hijmans, R. J., Li, J., Peterson, A. T., Graham, C. H., Guisan, A., et al. (2008). Effects of sample size on the performance of species distribution models. *Divers. Distrib.* 14, 763–773. doi:10.1111/j.1472-4642.2008.00482.x.

## Figures

**Fig. 1:** Phylogenetic hypotheses for *Crematosperma* based on *rbcL*, *matK*, *trnT-F*, *psbA-trnH*, *ndhF*, and *pseudtrnL-F*. A: Excluding taxa for which *ndhF* was unavailable; B: including all taxa. Topologies and branch lengths are of the best scoring ML trees with scale in substitutions per site. Branch lengths subtending the ingroup are not to scale. Clade support is indicated: ML and parsimony bootstrap percentages (above; left and right respectively) and Bayesian posterior probabilities (below); as are major clades referred to in the text.

**Fig. 2:** Phylogenetic hypotheses for *Mosannona* based on *rbcL*, *matK*, *trnL-F*, *psbA-trnH*, *ndhF*, *atpB-rbcL*, PHYC, and malate synthase. A: Excluding taxa for which *ndhF* was unavailable; B: including all taxa. Topologies and branch lengths are of the best scoring ML trees with scale in substitutions per site. Branch lengths subtending the ingroup are not to scale. Clade support is indicated: ML and parsimony bootstrap percentages (above; left and right respectively) and Bayesian posterior probabilities (below); as are major clades referred to in the text.

**Fig. 3:** Chronogram of Malmeeae, indicating nodes within *Crematosperma* and *Mosannona* that define the divergence of lineages to the west and east of the Andes, as referred to in the text and in Table 2. Distributions of the clades, plus those of the *Crematosperma* northern/lowland and southern/montane clades are illustrated on the inset maps.

**Fig. 4:** Graph showing the correlation per genus between Hellinger's *I* metric and patristic distance.

**Fig. 5:** Scheme of geological events and ages of clades in *Crematosperma* and *Mosannona*.

## Tables

**Table 1:** Included, variable and parsimony informative characters per DNA sequence marker, in descending order following the total number of informative characters in *Crematosperma*. Values are made comparable by the inclusion of only *Crematosperma*/*Mosannonna* taxa for which all sequences were available. To compare variable/informative characters per sequence, note that *rbcl*, *ndhF* and malate synthase were PCR amplified in at least two fragments.

| Marker                   | Included characters | Parsimony uninformative characters | Parsimony informative characters | Parsimony informative indels |
|--------------------------|---------------------|------------------------------------|----------------------------------|------------------------------|
| <sup>a</sup> <i>rbcl</i> | 1401/1387           | 37/9                               | 16/13                            | 0/0                          |
| <i>ndhF</i>              | 2038/2034           | 58/22                              | 12/2                             | 0/0                          |
| <i>pseud-trnLF</i>       | 535/-               | 9/-                                | 12/-                             | 1/-                          |
| <i>malate synthase</i>   | -/928               | -/21                               | -/12                             | -/0                          |
| <i>trnL-trnF</i>         | 961/909             | 27/19                              | 8/8                              | 1/0                          |
| <i>trnT-trnL</i>         | 898/-               | 30/-                               | 7/-                              | 1/-                          |
| <i>psbA-trnH</i>         | 483/449             | 13/4                               | 6/5                              | 2/0                          |
| <i>matK</i>              | 831/831             | 17/12                              | 7/3                              | 0/0                          |
| <i>atpB-rbcl</i>         | -/784               | -/7                                | -/2                              | -/1                          |
| Phytochrome C            | -/634               | -/9                                | -/2                              | -/0                          |

<sup>a</sup>Including 3' non coding region

Table 2: Relaxed clock molecular dating estimates for the ages of selected nodes given older and more recent secondary calibration points.

| Node                                                | Age (older) | Age (more recent) |
|-----------------------------------------------------|-------------|-------------------|
| A1                                                  | 22-9        | 11-4              |
| A2                                                  | 18-8        | 9-4               |
| B1                                                  | 24-11       | 13-5              |
| B2                                                  | 20-10       | 11-5              |
| C1                                                  | 18-7        | 9-3               |
| C2                                                  | 19-9        | 10-4              |
| <i>M. depressa</i> spp. stem                        | 24-11       | 13-5              |
| <i>M. depressa</i> spp. crown                       | 12-2        | 6-1               |
| <i>M. costaricensis</i> / <i>M. garwoodii</i> stem  | 22-9        | 11-4              |
| <i>M. costaricensis</i> / <i>M. garwoodii</i> crown | 15-5        | 8-2               |
| <i>C. sp.</i> Costa Rica stem                       | 20-10       | 11-5              |
| <i>C. panamense</i> stem                            | 14-5        | 7-2               |
| <i>C. westrae</i> stem                              | 10-2        | 5-1               |
| <i>Crematosperma</i> Lowland Amazonian clade stem   | 20-10       | 11-5              |
| <i>Crematosperma</i> Lowland Amazonian clade crown  | 14-5        | 7-2               |

Table 3: Within and between-area comparison of niche overlap (Hellinger's *I*).

| <i>Crematosperma</i>                                                    |                             | <i>Mosannona</i>                                      |                             |
|-------------------------------------------------------------------------|-----------------------------|-------------------------------------------------------|-----------------------------|
| Clade (number of species)                                               | Hellingers I within-clade   | Clade (number of species)                             | Hellingers I within-clade   |
| Lowland Amazonian (5)                                                   | 0.64 ± 0.06                 | Amazonian (4)                                         | 0.27 ± 0.06                 |
| Montane Amazonian (9)                                                   | 0.32 ± 0.04                 | Pacific/Central-American (5)                          | 0.20 ± 0.02                 |
| Pacific/Central-American (2)                                            | 0.16                        | Guianan/Venezuelan (1)                                | -                           |
| Guianan/Venezuelan (3)                                                  | 0.38 ± 0.02                 |                                                       |                             |
|                                                                         |                             |                                                       |                             |
| Clades compared                                                         | Hellingers I between-clades | Clades compared                                       | Hellingers I between-clades |
| Lowland Amazonian x Montane Amazonian                                   | 0.32 ± 0.02                 | Amazonian x Pacific/Central-American                  | 0.11 ± 0.02                 |
| Lowland Amazonian x Pacific/Central-American                            | 0.19 ± 0.03                 |                                                       |                             |
| Lowland Amazonian x Guianan/Venezuelian                                 | 0.08 ± 0.002                |                                                       |                             |
| Montane Amazonian x Pacific/Central-American                            | 0.14 ± 0.02                 |                                                       |                             |
| Montane Amazonian x Guianan/Venezuelian                                 | 0.15 ± 0.01                 | <b><i>Crematosperma/Mosannona</i> clades compared</b> |                             |
| Pacific/Central-American x Guianan/Venezuelian                          | 0.19 ± 0.03                 | Crem. Lowland Amazonian x Mos. Amazonian              | 0.42 ± 0.04                 |
| Montane group <i>C. pedunculatum</i> x Montane group <i>C. oblongum</i> | 0.31 ± 0.06                 | Crem. Montane Amazonian x Mos. Amazonian              | 0.35 ± 0.04                 |

Appendix 1: Accessions details

Appendix 2: Sequence matrices

Appendix 3: The eight independent climate layers and ten independent soil variable layers used for species distribution modelling.



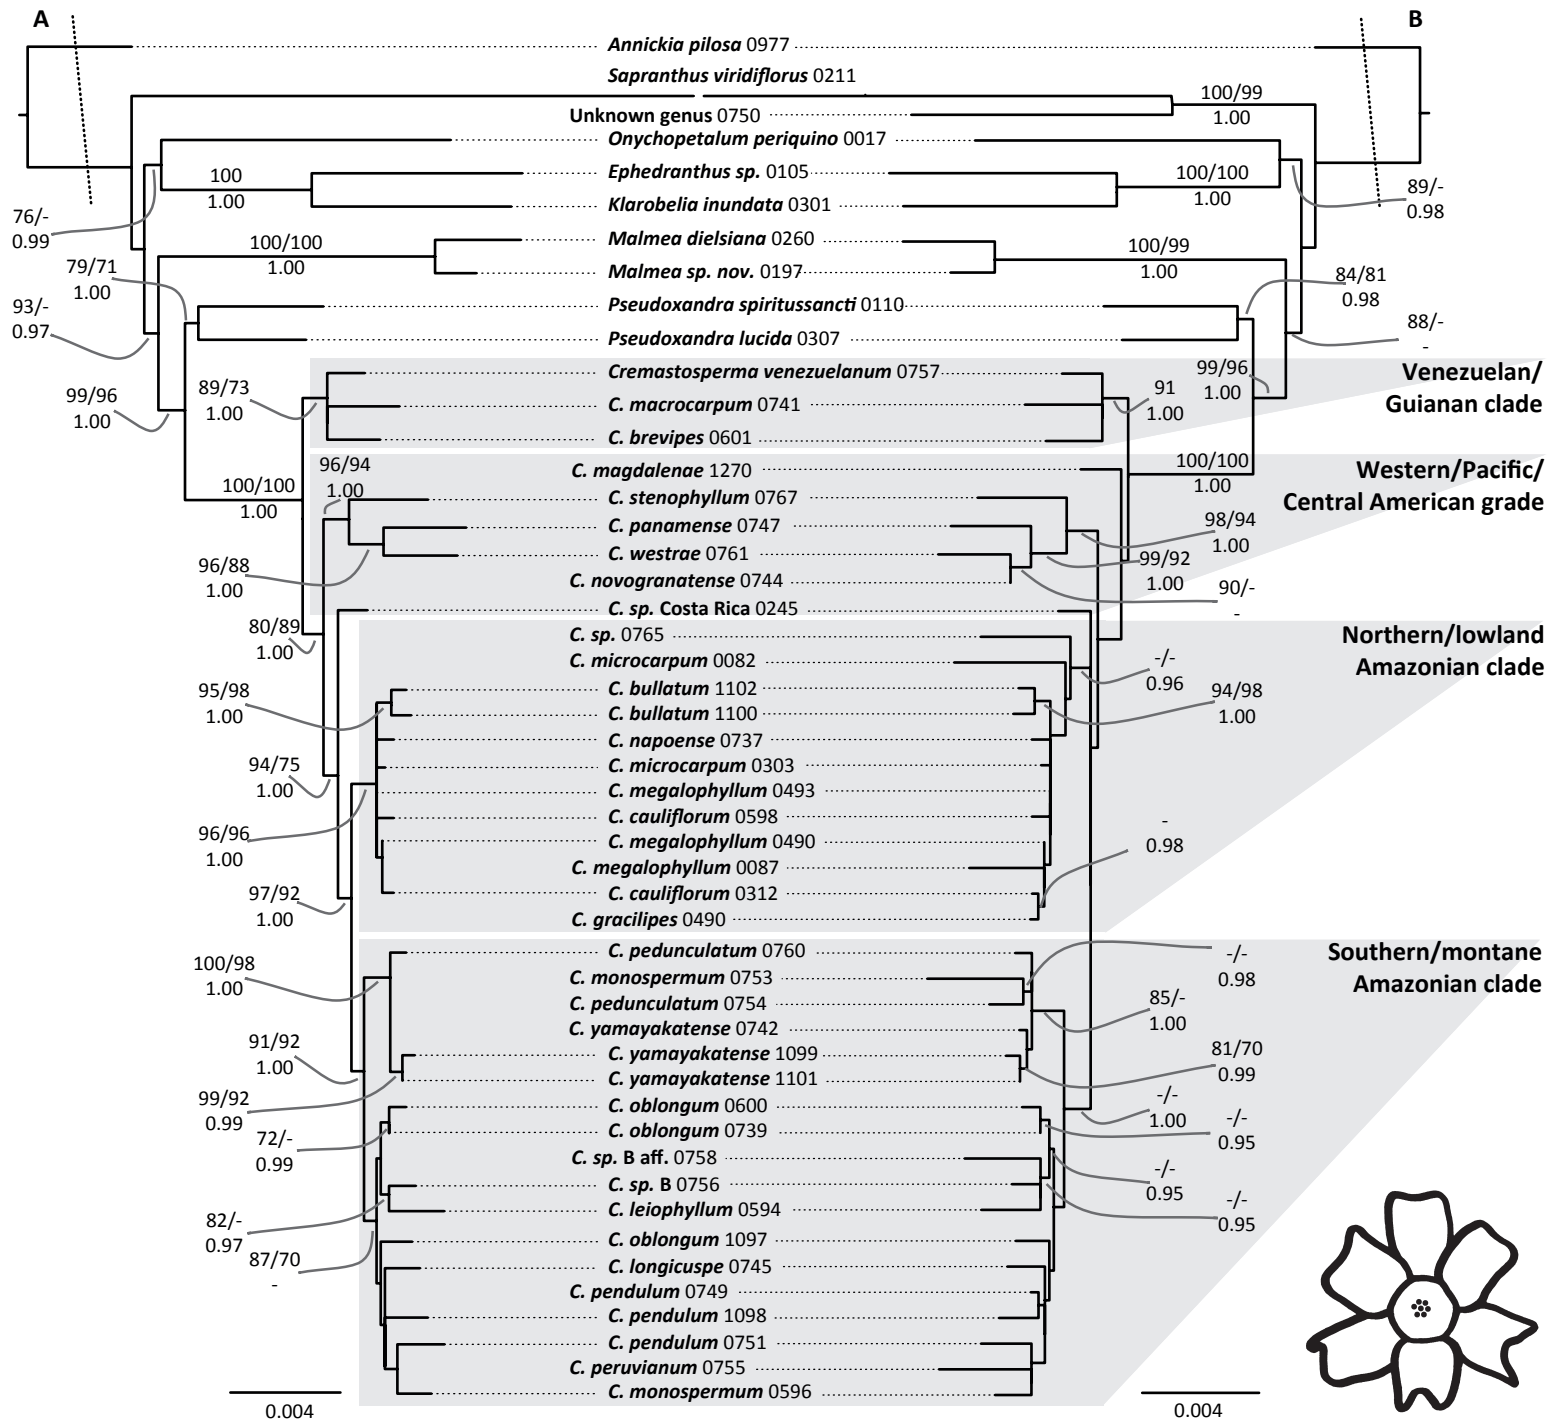

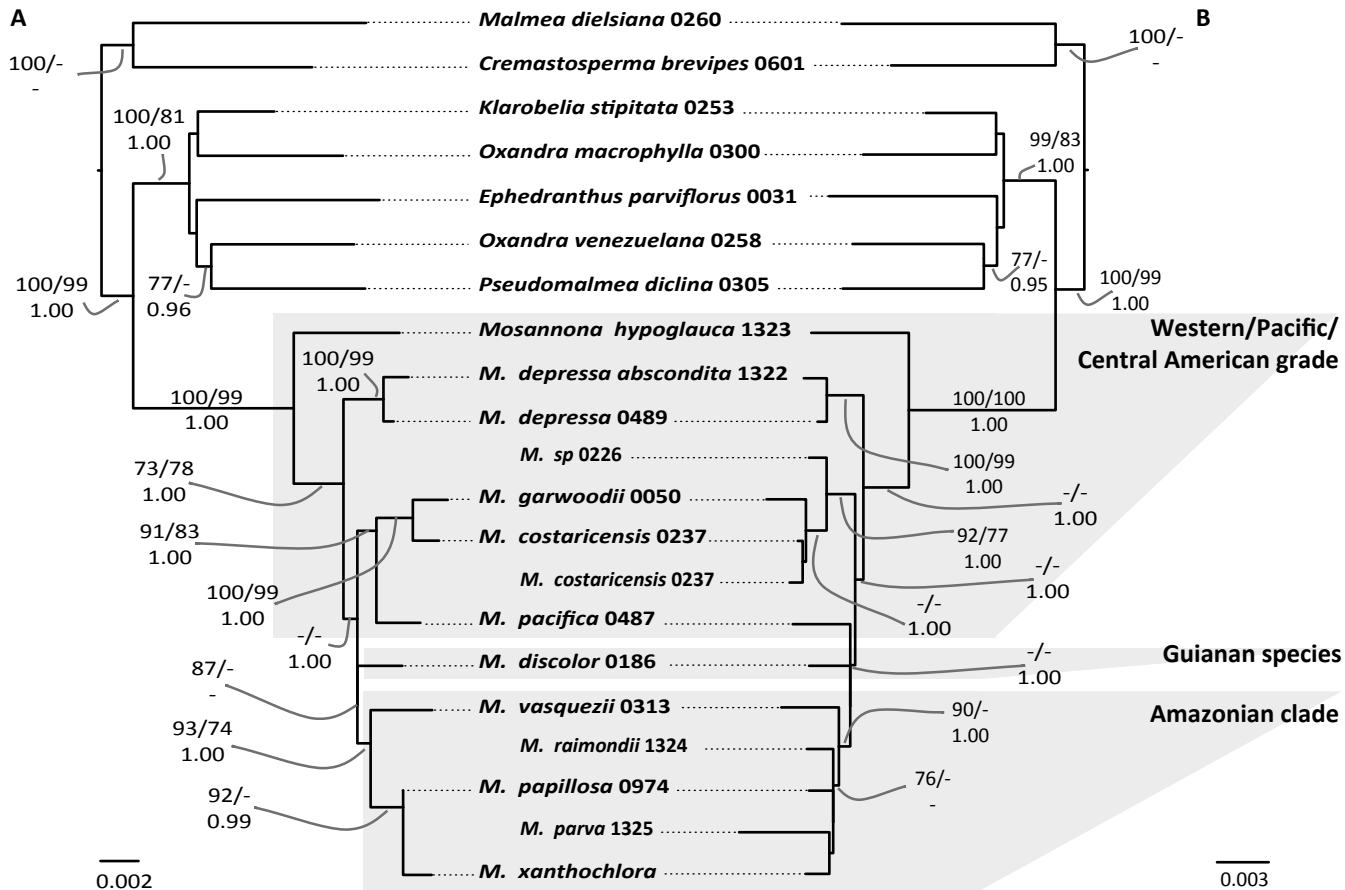

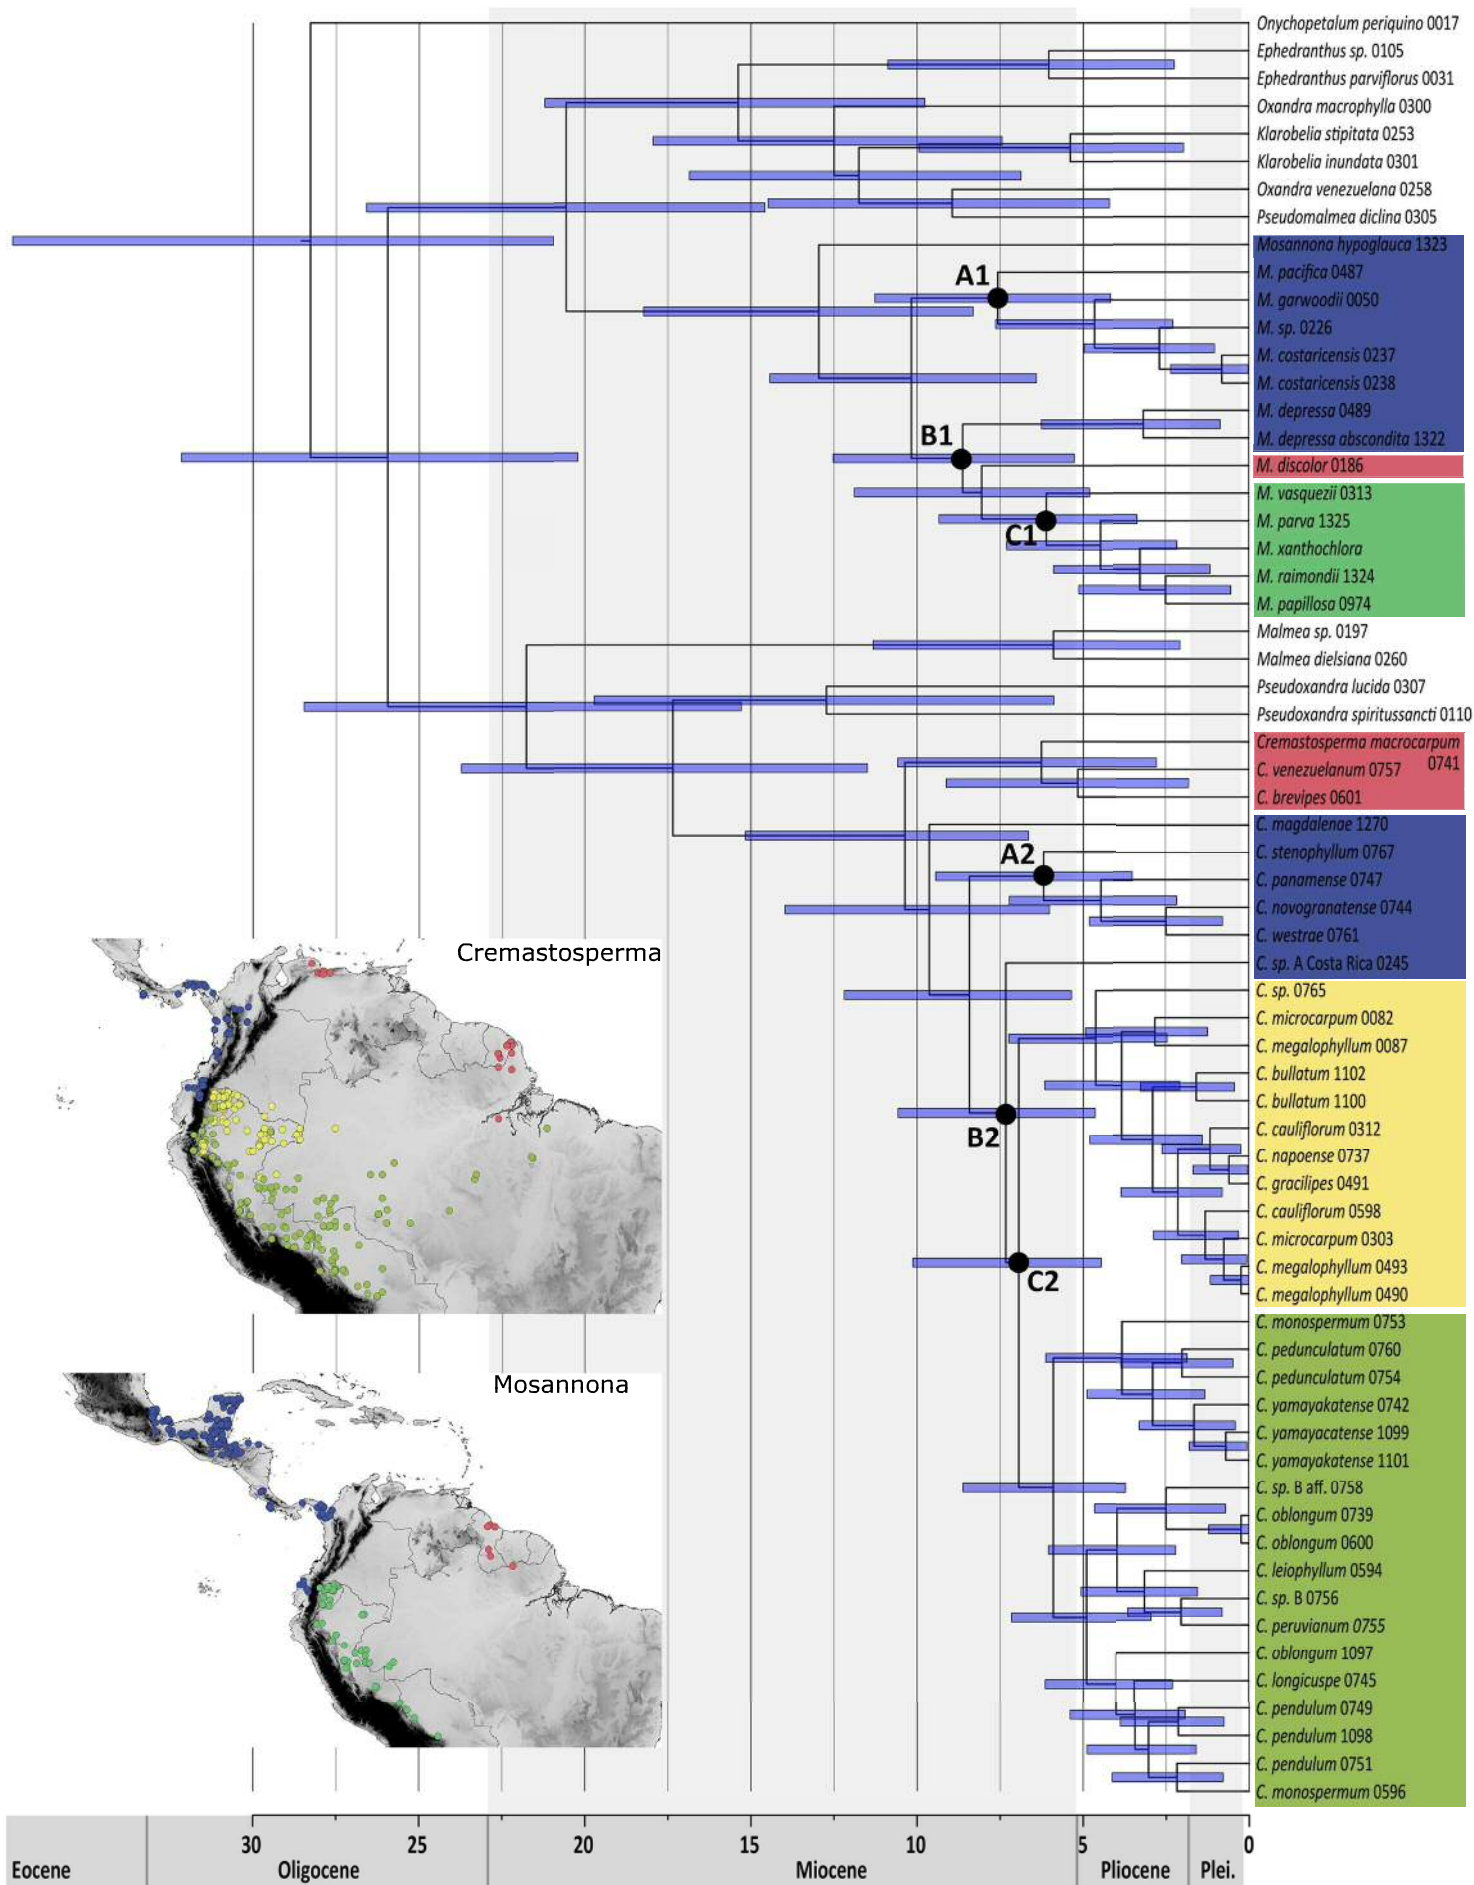

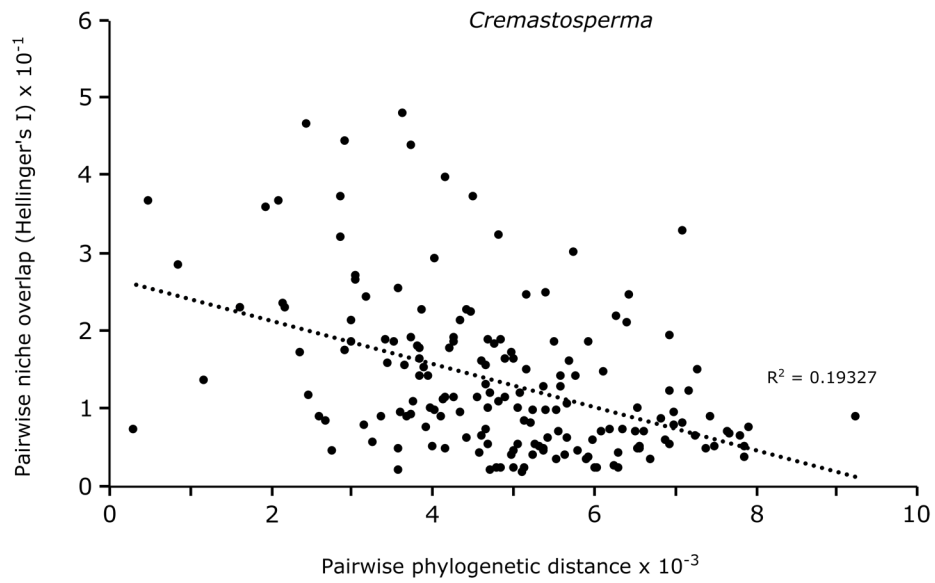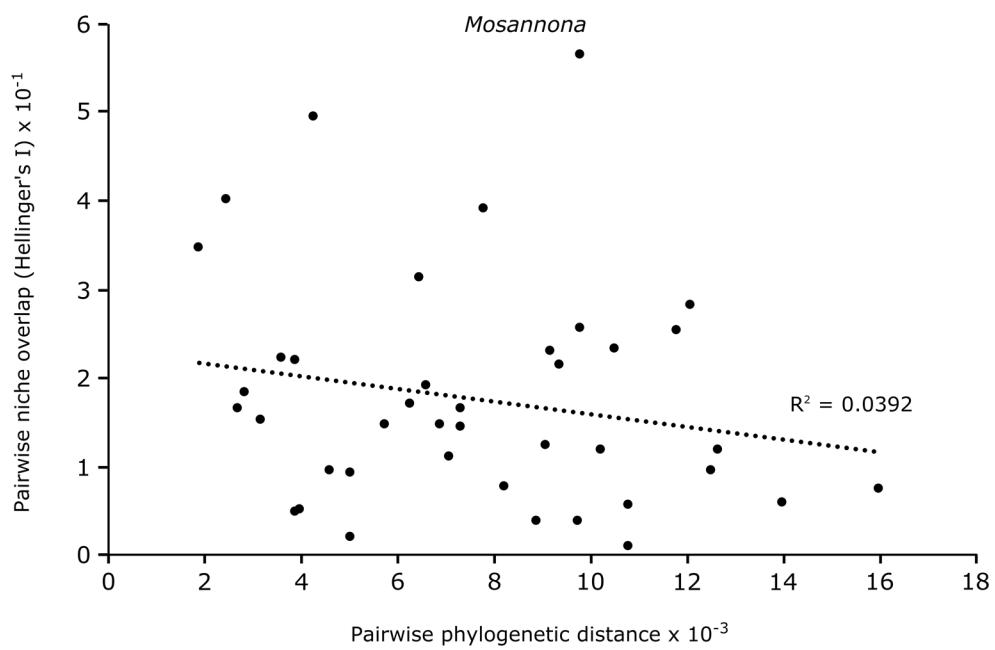

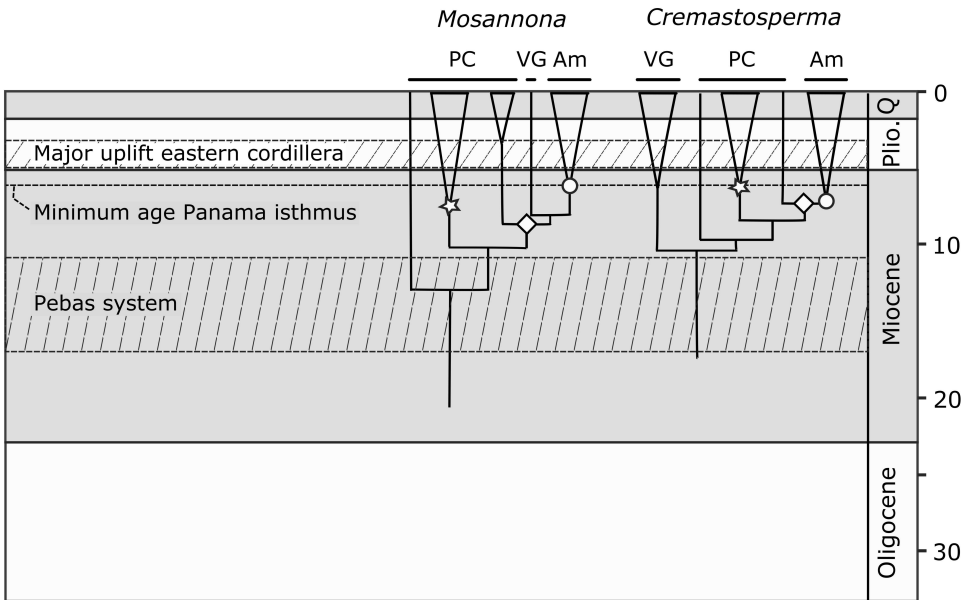

Source: https://www.biorxiv.org/content/10.1101/141127v1.full.pdf
